# Supplementary material for: Ultrathin MnO2 nanosheets grown on fungal conidium-derived hollow carbon spheres as supercapacitor electrodes
Source: Royal Society of Chemistry journal article supplement (doi:10.1039/c5ra22193e), 2016-01-01
Supplement: c5ra22193e1.pdf [file c5ra22193e1.pdf]

## Support information

---

### **Ultrathin MnO<sub>2</sub> Nanosheets Grown on Fungal Conidium-derived Hollow Carbon Spheres as Supercapacitor Electrodes**

Cuiping Mao,<sup>ab</sup> Sangui Liu,<sup>ab</sup> Lei Pang,<sup>ab</sup> Qi Sun,<sup>c</sup> Yang Liu,<sup>c</sup> Maowen Xu,<sup>\*ab</sup> and Zhisong Lu<sup>\*ab</sup>

<sup>a</sup> Chongqing Key Laboratory for Advanced Materials & Technologies of Clean Energies, Southwest University, 1 Tiansheng Road, Chongqing 400715, P. R. China

<sup>b</sup> Institute for Clean Energy & Advanced Materials, Faculty of Materials & Energy, Southwest University, 1 Tiansheng Road, Chongqing 400715, P. R. China

<sup>c</sup> Institute of Agro-Products Processing Science and Technology, Chinese Academy of Agricultural Sciences/Key Laboratory of Agro-Products Processing, Ministry of Agriculture, No. 2 Yuan Ming Yuan West Road, Beijing 100193, P. R. China

\*: Author to whom correspondence should be addressed. Tel.: +86-23-68254732; Fax: +86-23-68254969. E-mail: [zslu@swu.edu.cn](mailto:zslu@swu.edu.cn) or [xumaowen@swu.edu.cn](mailto:xumaowen@swu.edu.cn).

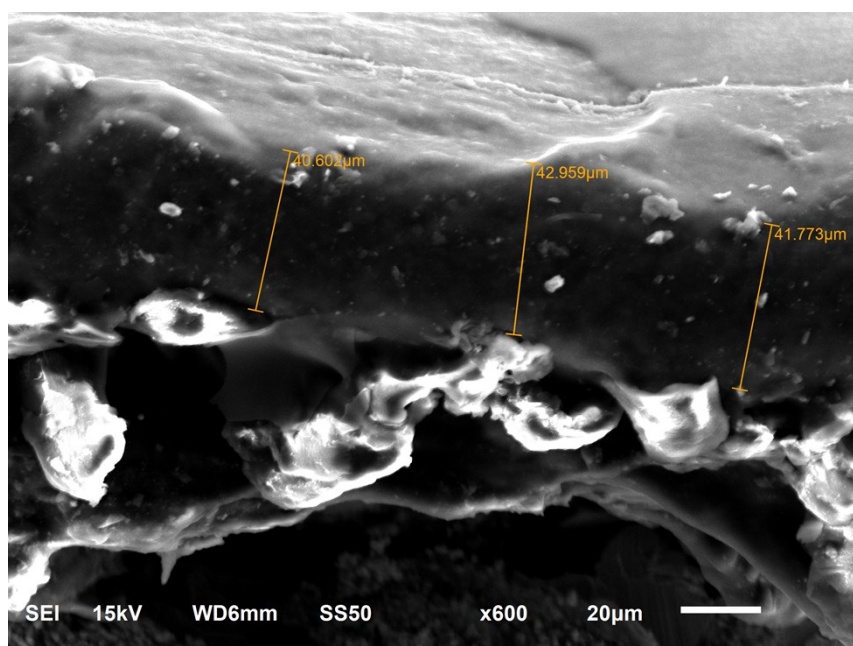

**Figure S1.** Cross-section SEM image of MnO<sub>2</sub>@CC composites on the nickel form.

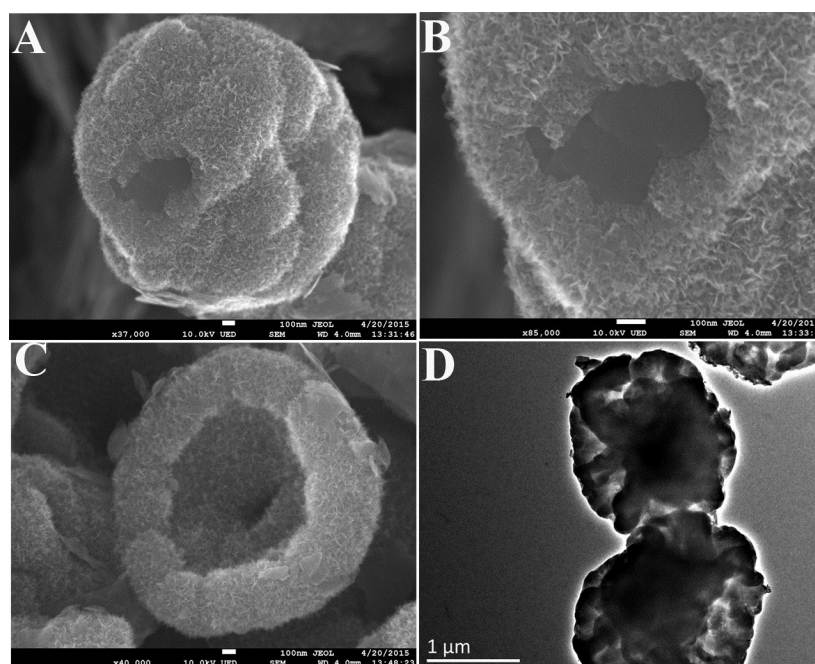

**Figure S2.** FESEM and TEM image of conidium-derived hollow carbon spheres.

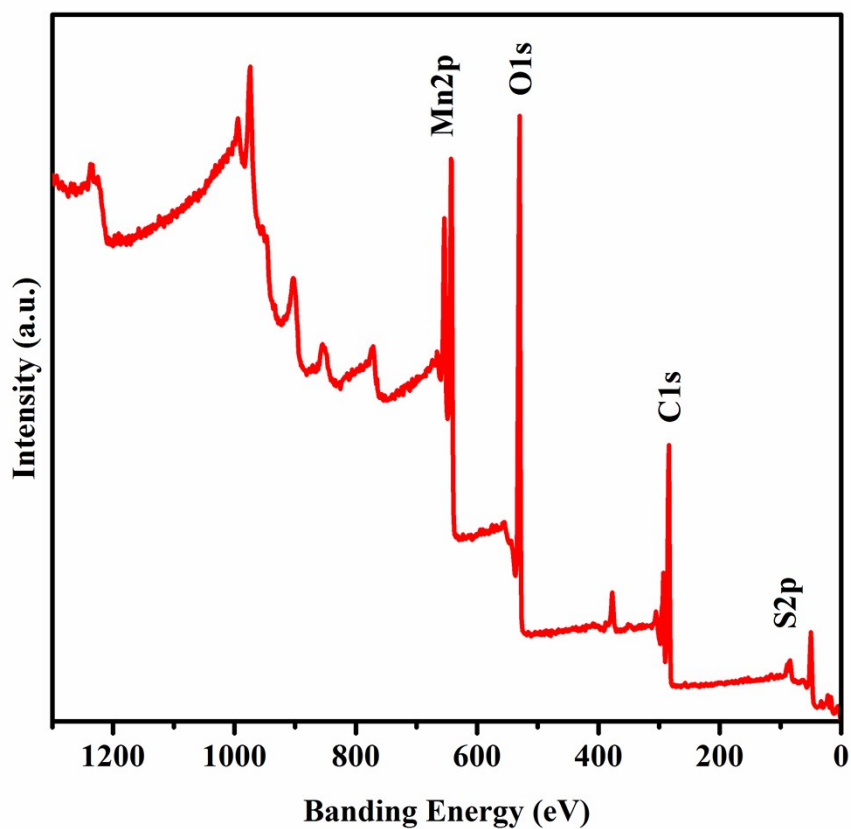Figure S3. Survey spectrum of  $\text{MnO}_2@CC$ .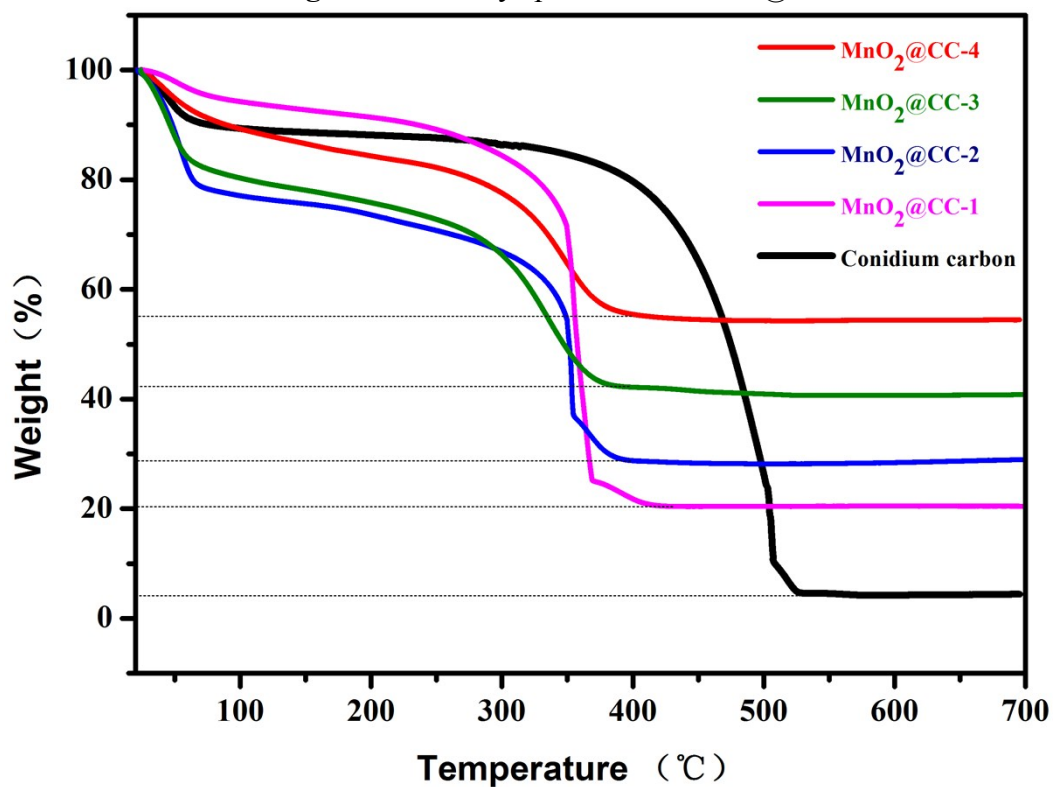Figure S4. TGA curves of conidium carbon and  $\text{MnO}_2@CC$  composites.

## Support information

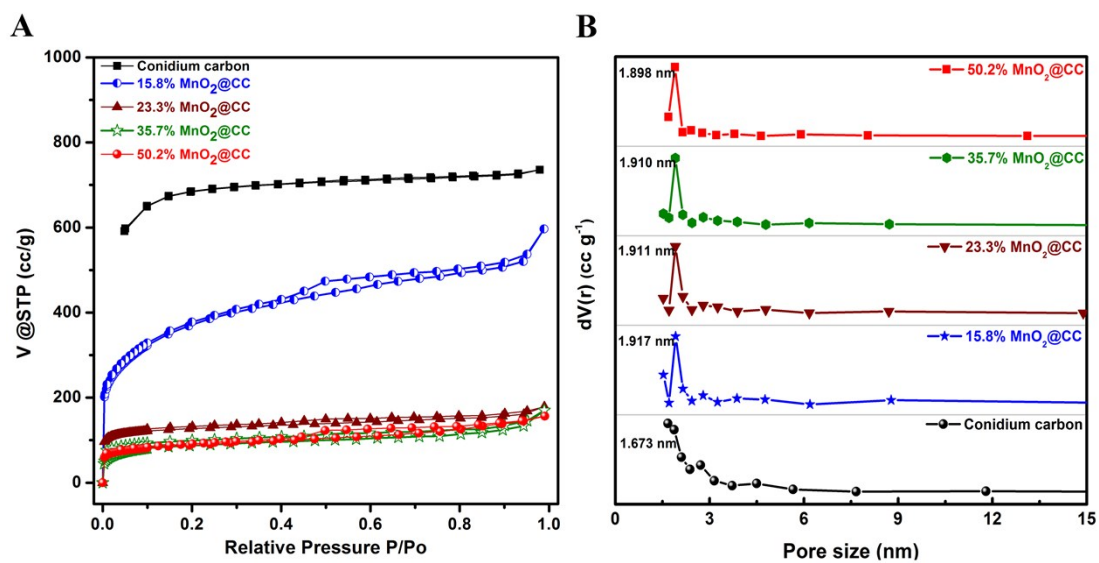

**Figure S5.**  $N_2$  adsorption-desorption isotherms (A) and the corresponding pore size distribution (B) of conidium-derived and  $MnO_2@CC$  composites

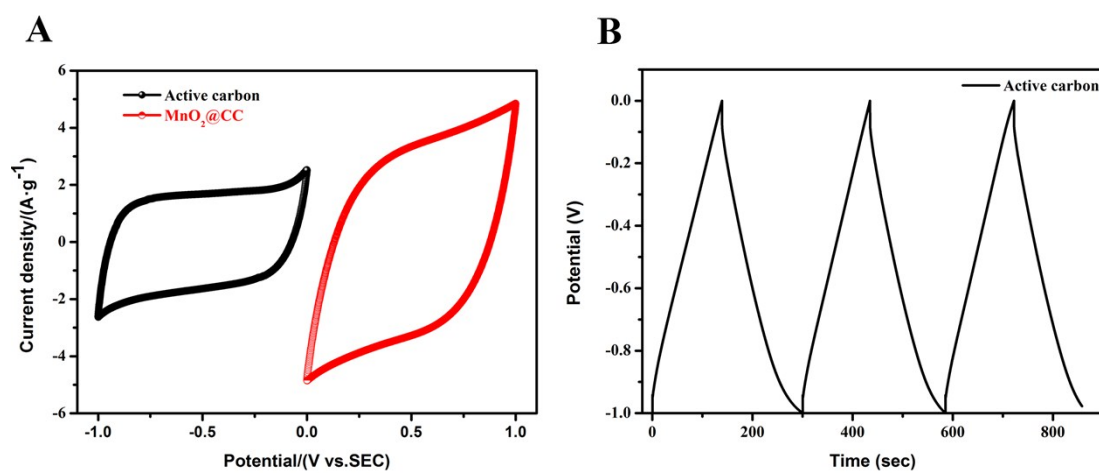

**Figure S6.** CV curves of active carbon and  $MnO_2@CC$  composites recorded in a three-electrode cell.

## Support information

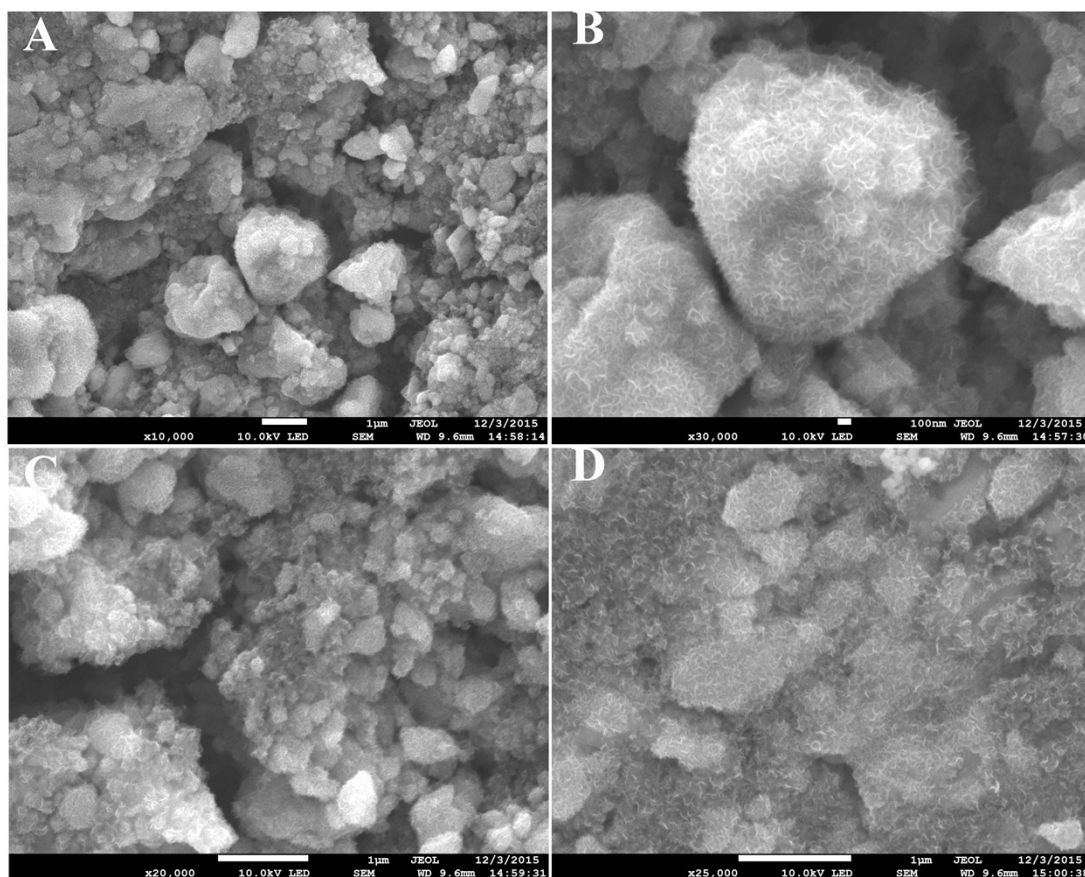

**Figure S7.** FESEM images of MnO<sub>2</sub>@CC composites after 1000 cycles in asymmetric supercapacitor.

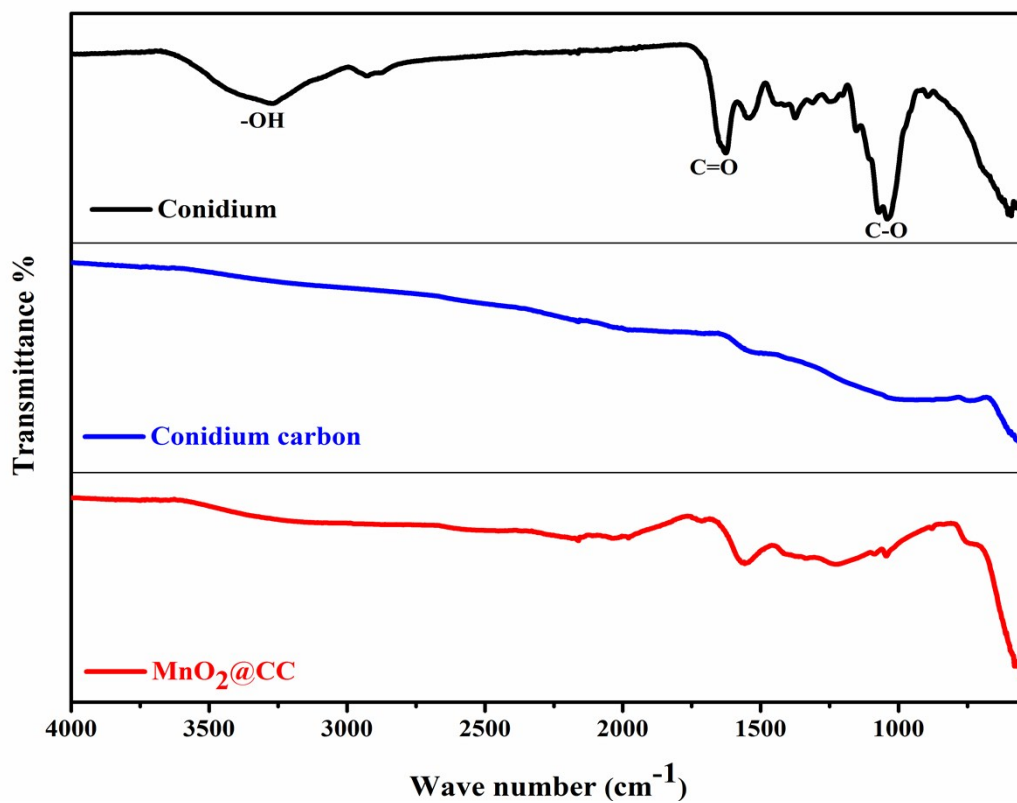

## Support information

Figure S8. FTIR spectra of the samples.

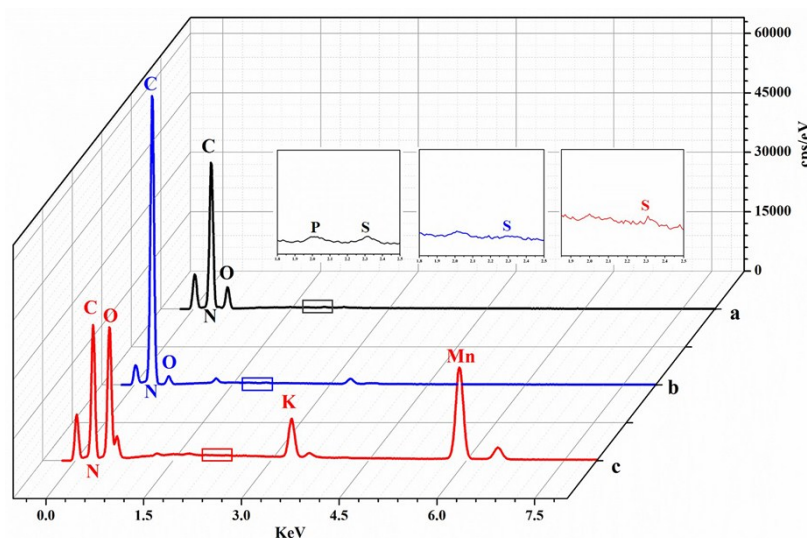

Figure S9. EDS spectra of  $\text{MnO}_2@CC$ .

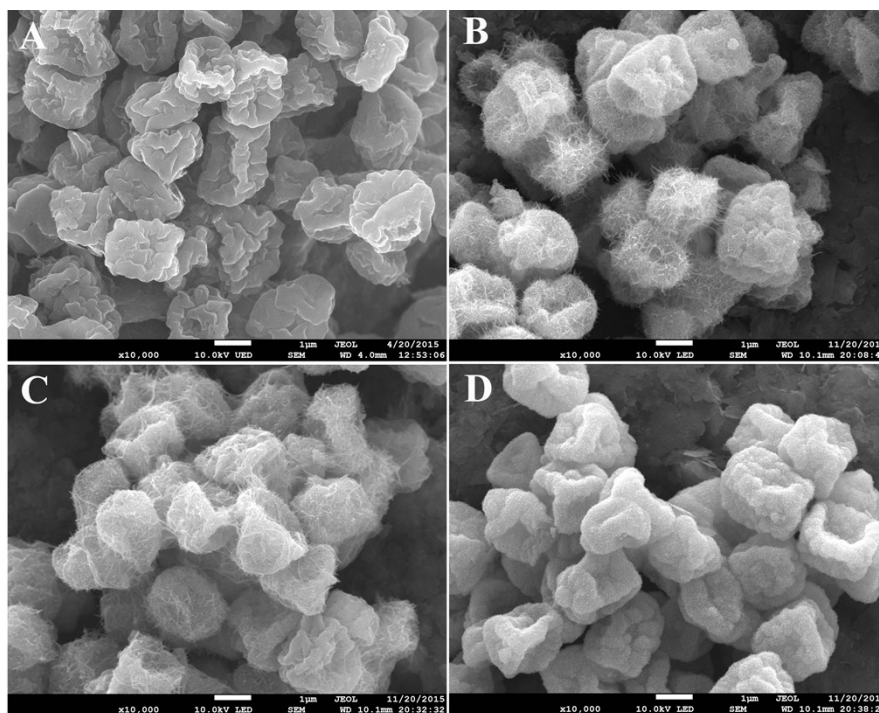

Figure S10. FESEM images of conidium carbon and  $\text{MnO}_2@CC$  composites: (A) conidium carbon, (B) 15.8%  $\text{MnO}_2@CC$  composites, (C) 23.3%  $\text{MnO}_2@CC$  composites, (D) 35.7%  $\text{MnO}_2@CC$  composites

## Support information

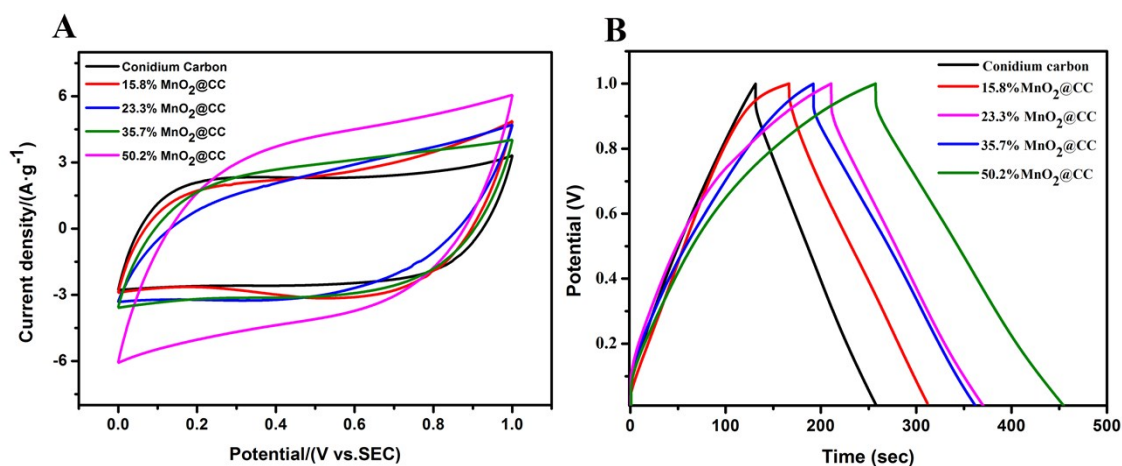

**Figure S11.** (A) CV curves of conidium carbon and MnO<sub>2</sub>@CC composites at the scan speed of 20 mV/s; (B) Galvanostatic charge/discharge curves at a current density of 1 A/g for conidium carbon and MnO<sub>2</sub>@CC composites.

**Table 1** Characterization of different content of MnO<sub>2</sub> in the composites

| Samples                | Content of MnO <sub>2</sub><br>(wt%) | S <sub>BET</sub><br>(m <sup>2</sup> g <sup>-1</sup> ) | Pore size<br>(nm) | Specific capacitance<br>(F g <sup>-1</sup> ) |
|------------------------|--------------------------------------|-------------------------------------------------------|-------------------|----------------------------------------------|
| Conidium carbon        | 0                                    | 2123.96                                               | 1.67              | 107.8                                        |
| MnO <sub>2</sub> @CC-1 | 15.8                                 | 1362.98                                               | 1.91              | 147.4                                        |
| MnO <sub>2</sub> @CC-2 | 23.3                                 | 484.53                                                | 1.91              | 160.0                                        |
| MnO <sub>2</sub> @CC-3 | 35.7                                 | 337.90                                                | 1.91              | 172.5                                        |
| MnO <sub>2</sub> @CC-4 | 50.2                                 | 324.08                                                | 1.90              | 263.5                                        |

## Support information

**Table S2** Comparison of the specific capacitances of MnO<sub>2</sub> and MnO<sub>2</sub>-carbon composites electrodes

| Materials                                                                                                    | Specific capacitance (F g <sup>-1</sup> ) | Electrolyte                           | Ref.     |
|--------------------------------------------------------------------------------------------------------------|-------------------------------------------|---------------------------------------|----------|
| Crystalline MnO <sub>2</sub>                                                                                 | 110 (2mV/s)                               | 0.1 M K <sub>2</sub> SO <sub>4</sub>  | 1        |
| MnO <sub>2</sub> Nanorods                                                                                    | 201 (10 mV/s)                             | 0.5 M Li <sub>2</sub> SO <sub>4</sub> | 2        |
| 3D Manganese Oxide Nanoflowers                                                                               | 121.5 (5mV/s)                             | 6 M KOH                               | 3        |
| Needle-like MnO <sub>2</sub>                                                                                 | 233.5(100mV/s)                            | 1 M Na <sub>2</sub> SO <sub>4</sub>   | 4        |
| Manganese Oxide Nanorod                                                                                      | 140(1mV/s)                                | 1 M Na <sub>2</sub> SO <sub>4</sub>   | 5        |
| Manganese oxide films                                                                                        | 230.5(25 mV/s)                            | 1 M Na <sub>2</sub> SO <sub>4</sub>   | 6        |
| MnO <sub>2</sub> loaded biomass carbonaceous aerogel composites (MnO <sub>2</sub> @CA)                       | 123.5 (5 mV/s)                            | 6 M KOH                               | 7        |
| MnO <sub>2</sub> dipped biomass carbon skeleton from Lotus Pollen (MnO <sub>2</sub> /C)                      | 257 (0.5 A/g)                             | 1 M Na <sub>2</sub> SO <sub>4</sub>   | 8        |
| MnO <sub>2</sub> loaded Bacterial-Cellulose-Derived Carbon (p-BC@MnO <sub>2</sub> // p-BC@MnO <sub>2</sub> ) | 256.7(1.0 A/g)                            | 1 M Na <sub>2</sub> SO <sub>4</sub>   | 9        |
| MnO <sub>2</sub> -doped, polyaniline-grafted rice husk ash nanocomposites (PANI/MnO <sub>2</sub> /RHA)       | 135 (0.5 mA/g)                            | 0.5 M Na <sub>2</sub> SO <sub>4</sub> | 10       |
| MnO <sub>2</sub> grown on Fungal Conidium-derived Hollow Carbon Spheres(MnO <sub>2</sub> @CC)                | 263.5 (1.0 A/g)                           | 1 M Na <sub>2</sub> SO <sub>4</sub>   | Our work |



## Support information

---

### Reference

1. T. Brousse, M. Toupin, R. Dugas, L. Athouël, O. Crosnier and D. Bélanger, *J. Electrochem. Soc.*, 2006, **153**, A2171.
2. Q. Qu, P. Zhang, B. Wang, Y. Chen, S. Tian, Y. Wu and R. Holze, *J. Phys. Chem. C*, 2009, **113**, 14020-14027.
3. J. Ni, W. Lu, L. Zhang, Y. Yue, X. Shang and Y. Lv, *J. Phys. Chem. C*, 2008, **113**, 54-60.
4. S. Chen, J. Zhu, Q. Han, Z. Zheng, Y. Yang and X. Wang, *Cryst. Growth Des.*, 2009, **9**, 4356-4361.
5. k. Kuratani, k. Tatsumi, and N. Kuriyama, *Cryst. Growth Des.*, 2007, **7**, 1375-1377.
6. C. -K. Lin, K. -H. Chuang, C. -Y. Lin. C. -Y. Tsay, C. -Y. Chen, *Surf. Coat. Tech.*, 2007, **202**, 1272-1276.
7. Y. Ren, Q. Xu, J. Zhang, H. Yang, B. Wang, D. Yang, J. Hu and Z. Liu, *ACS Appl. Mater. Interfaces*, 2014, **6**, 9689-9697.
8. H. Li, B. Wang, X. He, J. Xiao, H. Zhang, Q. Liu, J. Liu, J. Wang, L. Liu, P. Wang, *J. Mater. Chem. A*, 2015, **3**, 9754-9762.
9. L. F. Chen, Z. H. Huang, H. W. Liang, Q. F. Guan and S. H. Yu, *Adv. Mater.*, 2013, **25**, 4746-4752.
10. P. Prabunathan, K. Sethuraman and M. Alagar, *RSC Adv.*, 2014, **4**, 47726
